# Supplementary material
Source: publisher site journal article supplement (https://www.dovepress.com/article/425101)
Supplement: Supplementary file 1 [file get_supplementary_file.php]

**Supplementary materials**

This appendix has been provided by the authors to give readers additional information about their work.

**Contents**

[**Appendix** 3](#_Toc151744828)

[**Appendix 1:** Institutional Review Board of the LIBERTY ASTHMA VOYAGE study 3](#_Toc151744829)

[**Appendix 2:** List of participating investigators of the LIBERTY ASTHMA VOYAGE study by country 3](#_Toc151744830)

[**SUPPLEMENTARY TABLES** 5](#_Toc151744831)

[**Table S1.** Change of pre-bronchodilator ppFEV1 over time in children with moderate-to-severe asthma who had ≥5% or ≥10% improvements in pre-bronchodilator ppFEV1 from baseline by Week 12. 5](#_Toc151744832)

[**Table S2.** Change of pre-bronchodilator ppFEV1 over time in children with moderate-to-severe asthma who had <5% or <10% improvements in pre-bronchodilator ppFEV1 from baseline by Week 12. 6](#_Toc151744833)

# **Appendix**

## **Appendix 1: Institutional Review Board of the LIBERTY ASTHMA VOYAGE study**

Washington University School of Medicine, 660 S. Euclid Ave, Campus Box 8089, St. Louis, MO, 63110, UNITED STATES.

## **Appendix 2: List of participating investigators of the LIBERTY ASTHMA VOYAGE study by country**

- **Argentina:** Alberto Tolcachier, Horacio Budani, Jorge Maspero, Miguel Bergna, Luis Gustavo Aguero
- **Australia:** Constance Katelaris, Peter Sly, Philip Robinson, Andrew Tai
- **Brazil:** Gilberto Fischer, Gustavo Wandalsen, Flavio Sano, Antonio Pastorino, Martti Antila, Renato Stein, Marina Lima
- **Canada:** Philippe Bégin, Jason Ohayon, Remi Gagnon
- **Chile:** Mario Calvo, Carlos Quilodran, Patricia Diaz, Carlos Ubilla, Viviana Lezana, Sergio Vargas
- **Columbia:** Gustavo Ordoñez, Jorge Mario Sánchez Caraballo
- **Hungary:** Zita Bauer, Katalin H. Nagy, István Laki, Zoltan Novak, Eva Gacs, Ildikó Kiss, Gabor Papp,Adrienne Nagy, Nóra Kovács
- **Italy:** Giorgio Piacentini, Enrico Lombardi, Stefania Zanconato, Alessandro Giovanni Fiocchi, Salvatore Leonardi
- **Lithuania:** Odilija Rudzeviciene, Jolanta Kudzyte, Rima Sabaliene, Migle Klimantaviciene, Rita Sopiene
- **Mexico:** Sandra Nora Gonzalez Diaz, Jorge De Jesus Pascual Torres, Ricardo Ramirez Terrones, Marco Hugo Sanchez-Bustillos, Carlos Hernandez Barraza
- **Poland:** Iwona Stelmach, Ewa Springer, Grzegorz Gaszczyk
- **Romania:** Mihai Craiu
- **Russia:** Anna Galustyan, Anna Nezabudkina, Tatiana Pak, Olga Perminova, Andrey Kamaev, Elena Vishneva
- **South Africa:** Christiaan Scott, Jan Vermeulen
- **Spain:** Ines De Mir, José Moure González, Miguel Tortajada Girbes, Lorena Comeche, Maria Cols Roig
- **Turkey:** Bulent Enis Sekerel, Haluk Cokugras, Zeynep Tamay, Bulent Karadag, Derya Ufukaltintas, Nihat Sapan, Figen Gülen, Arzu Bakirtas
- **Ukraine:** Levgeniya Stepanova, Yuriy Reznychenko, Svitlana Nedelska, Svitlana Ilchenko, Valentyn Polyakov, Leonid Bezrukov, Tetyana Lytvynova, Tamara Berezna
- **United States of America:** Lawrence Sher, Neal Jain, Joseph Diaz, Roopen Patel, Leonard Bacharier, Jeffrey Stokes, Allison Ramsey, Sandy Durrani, Michael Daines, Rachel Miller, Joyce Yu, Georgiana Sanders, Todd Mahr, Jason Lang, Vinay Mehta, Sherry Farzan, Jeremy Cole, Maxcie Sikora, Christopher Chang, Lee Clore

# **SUPPLEMENTARY TABLES**

## **Table S1.** Change of pre-bronchodilator ppFEV1 over time in children with moderate-to-severe asthma who had ≥5% or ≥10% improvements in pre-bronchodilator ppFEV1 from baseline by Week 12.

|  | Children with improvements in pre-bronchodilator ppFEV1 of… | | | |
| --- | --- | --- | --- | --- |
|  | **… ≥5%** | | **… ≥10%** | |
|  | **Placebo** | **Dupilumab 100/200 mg q2w** | **Placebo** | **Dupilumab 100/200 mg q2w** |
|  | **n = 55** | **n = 139** | **n = 35** | **n = 105** |
| Baseline |  |  |  |  |
| Pre-bronchodilator FEV1,  mean (SD), L | 1.4 (0.5) | 1.4 (0.4) | 1.3 (0.4) | 1.3 (0.4) |
| Pre-bronchodilator ppFEV1, mean SD, % | 75.2 (14.4) | 73.3 (14.8) | 69.7 (12.4) | 70.2 (14.9) |
| Change from baseline at Week 2 |  |  |  |  |
| LS mean (SE)a,b | 11.1 (1.9) | 12.0 (1.3) | 12.9 (2.5) | 15.9 (1.6) |
| LS mean difference vs placebo (95%CI) a,b |  | 1.0 (−2.4, 6.0) |  | 3.0 (−2.56, 8.58) |
| *P*-value vs placebo |  | *P*=0.40 |  | *P*=0.29 |
| Change from baseline at Week 12 |  |  |  |  |
| LS mean (SE) a,b | 15.7 (1.5) | 19.2 (1.1) | 20.0 (1.9) | 23.9 (1.2) |
| LS mean difference vs placebo (95%CI) a,b |  | 3.5 (0.3, 6.8) |  | 3.9 (−0.2, 7.9) |
| *P*-value vs placebo |  | *P*=0.03 |  | *P*=0.06 |
| Change from baseline at Week 52 |  |  |  |  |
| LS mean (SE) a,b | 12.0 (2.3) | 17.4 (1.5) | 15.1 (3.0) | 21.7 (1.8) |
| LS mean difference vs placebo (95%CI)a |  | 5.4 (0.3, 10.5) |  | 6.7 (0.1, 13.3) |
| *P*-value vs placebo |  | *P*=0.04 |  | *P*=0.05 |
| achange from baseline presented in percentage points. bLS mean (SE) and LS mean difference vs placebo (95% CI) derived from an MMRM model with change from baseline in pre-bronchodilator ppFEV1 up to Week 52 as the response variable, and treatment, baseline weight group, region, ethnicity, baseline eosinophil level, baseline FeNO level, baseline ICS dose level, visit, treatment by-visit interaction, baseline ppFEV1 value and baseline-by-visit interaction as covariates.  Abbreviations: CI, confidence interval; FeNO, fractional exhaled nitric oxide; FEV1, forced expiratory volume in 1 second; ICS, inhaled corticosteroid; LS, least-square; MMRM, mixed models for repeated measures; ppFEV1, percent predicted FEV1; SD, standard deviation; SE, standard error. | | | | |

## **Table S2.** Change of pre-bronchodilator ppFEV1 over time in children with moderate-to-severe asthma who had <5% or <10% improvements in pre-bronchodilator ppFEV1 from baseline by Week 12.

|  | Children with improvements in pre-bronchodilator ppFEV1 of… | | | |
| --- | --- | --- | --- | --- |
|  | **… ≥5%** | | **… ≥10%** | |
|  | **Placebo** | **Dupilumab 100/200 mg q2w** | **Placebo** | **Dupilumab 100/200 mg q2w** |
|  | **n = 52** | **n = 83** | **n = 72** | **n = 117** |
| Baseline |  |  |  |  |
| Pre-bronchodilator FEV1,  mean (SD), L | 1.8 (0.5) | 1.8 (0.4) | 1.64 (0.45) | 1.60 (0.34) |
| Pre-bronchodilator ppFEV1, mean SD, % | 82.2 (13.9) | 84.6 (10.3) | 82.9 (13.7) | 84.0 (10.1) |
| Change from baseline at Week 2 |  |  |  |  |
| LS mean (SE)a,b | −2.4 (1.19) | 0.4 (1.0) | −0.02 (1.1) | 1.3 (0.9) |
| LS mean difference vs placebo (95%CI) a,b |  | 2.7 (−0.1, 5.5) |  | 1.3 (−1.3, 4.0) |
| *P*-value vs placebo |  | *P*=0.06 |  | *P*=0.32 |
| Change from baseline at Week 12 |  |  |  |  |
| LS mean (SE) a,b | −6.2 (1.2) | −4.3 (1.0) | −2.9 (1.1) | −1.5 (0.9) |
| LS mean difference vs placebo (95%CI) a,b |  | 1.8 (−0.9, 4.5) |  | 1.4 (−1.1, 4.0) |
| *P*-value vs placebo |  | *P*=0.19 |  | *P*=0.26 |
| Change from baseline at Week 52 |  |  |  |  |
| LS mean (SE) a,b | −3.7 (1.50) | 3.4 (1.2) | −1.8 (1.4) | 3.8 (1.1) |
| LS mean difference vs placebo (95%CI)a |  | 7.1 (3.4, 10.8) |  | 5.6 (2.3, 8.8) |
| *P*-value vs placebo |  | *P*<0.001 |  | *P*<0.001 |
| achange from baseline presented in percentage points. bLS mean (SE) and LS mean difference vs placebo (95% CI) derived from an MMRM model with change from baseline in pre-bronchodilator ppFEV1 up to Week 52 as the response variable, and treatment, baseline weight group, region, ethnicity, baseline eosinophil level, baseline FeNO level, baseline ICS dose level, visit, treatment by-visit interaction, baseline ppFEV1 value and baseline-by-visit interaction as covariates.  Abbreviations: CI, confidence interval; FeNO, fractional exhaled nitric oxide; FEV1, forced expiratory volume in 1 second; ICS, inhaled corticosteroid; LS, least-square; MMRM, mixed models for repeated measures; ppFEV1, percent predicted FEV1; SD, standard deviation; SE, standard error. | | | | |
